# Supplementary material for: Identification of specific organic contaminants in different units of a chemical production site
Source: Royal Society of Chemistry journal article supplement (doi:10.1039/c4em00034j), 2014-01-01
Supplement: c4em00034j1.pdf [file c4em00034j1.pdf]

**Table S1** Characteristic ion fragments ( $m/z$ ) of the contaminants detected in wastewaters from the chemical production site and reference compounds used for quantification

| Compound                                       | $m/z$    | Reference compound used for quantification (if different)               |
|------------------------------------------------|----------|-------------------------------------------------------------------------|
| Bromoform                                      | 173, 175 |                                                                         |
| 1,2,3,4-Tetrachlorobutane                      | 123, 125 | 1,1,2,2-Tetrachlorethane                                                |
| Chlorobicyclo[3.2.1]oct-2-ene                  | 113, 142 |                                                                         |
| Dichlorobenzene                                | 146, 148 |                                                                         |
| Chlorophenol                                   | 128, 130 |                                                                         |
| Dichlorophenol                                 | 162, 164 |                                                                         |
| Dichloroveratrol                               | 191, 206 | 2,3-Dichloroanisole                                                     |
| Trichlorobenzoic acid <sup>a</sup>             | 207, 209 | 2,3,5-Trichlorobenzoic acid, methyl ester                               |
| Dichloroaniline                                | 161, 163 |                                                                         |
| Trichloroaniline                               | 195, 197 |                                                                         |
| Chlorofluoroaniline                            | 145, 147 |                                                                         |
| Bromofluoroaniline                             | 189, 191 |                                                                         |
| 4-Bromo-2,6-dichloroaniline                    | 239, 241 |                                                                         |
| 2-Bromo-6-chloro-4-fluoroaniline               | 223, 225 |                                                                         |
| Chloroquinolinol                               | 179, 181 |                                                                         |
| Chloroindole                                   | 151, 153 |                                                                         |
| 5-Fluoroindole                                 | 108, 135 |                                                                         |
| Chlorothieno[2,3-c]pyridine                    | 169, 171 | 2-Chlorobenzothiazole                                                   |
| 2,3,5,6-Tetrafluorophenol <sup>b</sup>         | 137, 180 | 2,3,5,6-Tetrafluoroanisole                                              |
| 3'-(Trifluoromethyl)acetophenone               | 173, 188 |                                                                         |
| 3,4-Dichloromethylthiobenzene                  | 192, 194 |                                                                         |
| Dichlorothiophenol <sup>c</sup>                | 192, 194 | 3,4-Dichloromethylthiobenzene (derivatized from 3,4-dichlorothiophenol) |
| Tetramethylbutanedinitrile                     | 69       | 3'-(Trifluoromethyl)acetophenone                                        |
| 3,3-Diphenyl-2-propenenitrile                  | 165, 205 | 3'-(Trifluoromethyl)acetophenone                                        |
| N-Formylmorpholine                             | 110, 115 |                                                                         |
| Dimercaptomethane <sup>d</sup>                 | 61, 108  | 2,5-Dithiohexane (derivatized from 1,2-dimercaptoethane)                |
| 1,2-Dimercaptoethane <sup>e</sup>              | 61, 122  | 2,5-Dithiohexane (derivatized from 1,2-dimercaptoethane)                |
| 2-(Methylthio)acetic acid <sup>a</sup>         | 74, 120  |                                                                         |
| TCPP (Tris(chloropropyl)phosphate)             | 277      |                                                                         |
| TEP (Triethylphosphate)                        | 127, 155 |                                                                         |
| Tributylphosphate (TBP)                        | 99, 211  |                                                                         |
| DBMP (Dibutylmethylphosphonate)                | 97       | TEP                                                                     |
| BEHP (Bis(2-ethylhexyl)hydrogen phosphate)     | 99, 211  |                                                                         |
| Bisphenol A                                    | 213, 228 |                                                                         |
| TXIB (Trimethylpentanedioldiisobutyrate)       | 111      |                                                                         |
| Benzoic acid <sup>a</sup>                      | 105, 136 |                                                                         |
| Phenylacetic acid <sup>a</sup>                 | 91, 150  |                                                                         |
| 4- <i>tert</i> -Butylbenzoic acid <sup>a</sup> | 177, 192 |                                                                         |
| DIPN (Diisopropyl-naphthalene)                 | 197, 212 |                                                                         |

<sup>a</sup> Derivatized, detected and quantified as corresponding methylester

<sup>b</sup> Methylation product 2,3,5,6-tetrafluoroanisole was detected and quantified.

<sup>c</sup> Methylation product dichloromethylthiobenzene was detected and quantified.

<sup>d</sup> Methylation product 2,4-dithiopentane was detected and quantified.

<sup>e</sup> Methylation product 2,5-dithiohexane was detected and quantified.
