# Supplementary material for: Identification of specific organic contaminants in different units of a chemical production site
Source: Royal Society of Chemistry journal article supplement (doi:10.1039/c4em00034j), 2014-01-01
Supplement: c4em00034j2.pdf [file c4em00034j2.pdf]

**Table S2** Information on application and/or formation and toxicity of the organic contaminants identified in wastewaters from different units of the chemical production site

| Compound                                        | Application/Formation                                                                                                                                                | Group | Toxicity for freshwater animals                                                                                                                                                                       | Reference                                                                                                                                                                                                                                                          |
|-------------------------------------------------|----------------------------------------------------------------------------------------------------------------------------------------------------------------------|-------|-------------------------------------------------------------------------------------------------------------------------------------------------------------------------------------------------------|--------------------------------------------------------------------------------------------------------------------------------------------------------------------------------------------------------------------------------------------------------------------|
| <b>Halogenated compounds</b>                    |                                                                                                                                                                      |       |                                                                                                                                                                                                       |                                                                                                                                                                                                                                                                    |
| Bromoform (No. 1)                               | Solvent, educt for pharmaceutical manufacturings; ingredient in fire-resistant chemicals, by-product of wastewater chlorination                                      | U     | LC <sub>50</sub> 46 mg L <sup>-1</sup> , 48 h, <i>Daphnia magna</i>                                                                                                                                   | ENVICHEM data base<br>A. O. Wistrom, T. Chou, D. P. Y. Chang, E. D. Schroeder, <i>Water Research</i> , 1996, <b>30</b> , 3146-3151;                                                                                                                                |
| 1,2,3,4-Tetrachlorobutane (No. 2)               | Educt for the synthesis of resins, educt for the polymer manufacturing                                                                                               | PR    | -                                                                                                                                                                                                     |                                                                                                                                                                                                                                                                    |
| 3-Chlorobicyclo[3.2.1]oct-2-ene (No. 3)         | Educt for the synthesis of bicyclo[3.2.1]octan-3-one, educt for the synthesis of medications for cocaine abuse                                                       | P     | -                                                                                                                                                                                                     | P. C. Meltzer, P. Blundell, Z. Chen, Y. F. Yong, B. K. Madras, <i>Bioorganic &amp; medicinal chemistry letters</i> , 1999, <b>9</b> , 857-862;<br><br>C. P. Chang, C. H. Chen, G. J. Chuang, C. C. Liao, <i>Tetrahedron Letters</i> , 2009, <b>50</b> , 3414-3417; |
| Dichlorobenzene (No. 4)                         | Solvent in industry, degreasing agent for metals, leather and wool; ingredient of metal polishes, intermediate in the manufacture of dyes and agricultural chemicals | U     | 1,4-Dichlorobenzene EC <sub>50</sub> 0.74 mg L <sup>-1</sup> , 48 h, <i>Daphnia magna</i><br><br>1,2-Dichlorobenzene EC <sub>50</sub> 0.74 mg L <sup>-1</sup> , 48 h, <i>Daphnia magna</i>            | CCR chemical data base                                                                                                                                                                                                                                             |
| Chlorophenol (No. 5) and Dichlorophenol (No. 6) | Chlorophenols are used as educts for the synthesis of agricultural chemicals, pharmaceuticals, biocides, and dyes                                                    | U     | 2-Chlorophenol: LC <sub>50</sub> 2.6 mg L <sup>-1</sup> , 48 h, <i>Daphnia magna</i><br><br>2,4-Dichlorophenol: LC <sub>50</sub> 0.26 mg L <sup>-1</sup> , <i>Carassius auratus</i> , goldfish, 192 h | CCR chemical data base<br><br>ENVICHEM data base                                                                                                                                                                                                                   |
| Dichloroveratrol (No. 7)                        | Used as fungicide                                                                                                                                                    |       | Fish toxicity LC <sub>50</sub> 2.0 mg L <sup>-1</sup> (as predicted by PNN)                                                                                                                           | CCR chemical data base                                                                                                                                                                                                                                             |

|                                           |                                                                                                                                                        |   |                                                                                                                        |                                                                                                                                                                           |
|-------------------------------------------|--------------------------------------------------------------------------------------------------------------------------------------------------------|---|------------------------------------------------------------------------------------------------------------------------|---------------------------------------------------------------------------------------------------------------------------------------------------------------------------|
| Trichlorobenzoic acid (No. 8)             | In herbicide formulations (former use); in synthesis of antimicrobial and anti-inflammatory agents                                                     | U | -                                                                                                                      | P. Karegoudar, D.J. Prasad, M. Ashok, M. Mahalinga, B. Poojara, B.S. Holla, <i>European journal of medicinal chemistry</i> , 2008, <b>43</b> , 808-815;                   |
| Dichloroaniline (No. 9)                   | Intermediate in the production of plastics, dyestuffs, pesticides and pharmaceuticals                                                                  | U | 2,5-Dichloroaniline: LC <sub>50</sub> 2.92 mg L <sup>-1</sup> , 48 h, <i>Daphnia magna</i>                             | ENVICHEM data base                                                                                                                                                        |
| Trichloroaniline (No. 10)                 | Intermediate in the manufacture of chlorinated benzene derivatives, fungicides, dyestuffs, product of microbial and chemical degradation of pesticides | U | 2,4,6- Trichloroaniline, LC <sub>50</sub> 8.2 mg L <sup>-1</sup> , 48 h, <i>Oryzias latipes</i> , orange-red killifish | W. R. Mitchell, S. H. Hoke, A. B. Rosencrance, <i>Journal of Environmental Science &amp; Health Part A</i> , 1984, <b>19</b> , 679-696;                                   |
| Chlorofluoroaniline (No. 11)              | Intermediate for pharmaceuticals                                                                                                                       | P | -                                                                                                                      | e.g. R. K. Gilpin, L. A. Pachla, <i>Analytical chemistry</i> , 1997, <b>69</b> , 145-164;                                                                                 |
| Bromofluoroaniline (No. 12)               | Intermediate for pharmaceuticals                                                                                                                       | P | -                                                                                                                      | G. Zareba, J. Castaner, J. Bozzo, <i>Drugs of the Future</i> , 2005, <b>30</b> , 138-146;<br><br>M. T. Stone, <i>Organic Letters</i> , 2011, <b>13</b> , 2326-2329;       |
| 4-Bromo-2,6-dichloroaniline (No. 13)      | Intermediate for agricultural chemicals, azodyes, and pigments and pharmaceuticals                                                                     | U | -                                                                                                                      | B. Latli, M. Hrapchak, D. Krishnamurthy, C. H. Senanayake, <i>Journal of Labelled Compounds and Radiopharmaceuticals</i> , 2008, <b>51</b> , 283-285;                     |
| 2-Bromo-6-chloro-4-fluoroaniline (No. 14) | Intermediate for pharmaceuticals                                                                                                                       | P | -                                                                                                                      | K. Menzel, F. Machrouhi, M. Bodenstein, A. Alorati, C. Cowden, A. W. Gibson, D. E. Frantz, <i>Organic Process Research &amp; Development</i> , 2009, <b>13</b> , 519-524; |
| Chloroquinolinol (No. 15)                 | Pharmaceutical                                                                                                                                         | P | -                                                                                                                      | Z. Q. Liu, K. Han, Y. J. Lin, X. Y. Luo, <i>Biochimica et Biophysica Acta (BBA)-General Subjects</i> , 2002, <b>1570</b> , 97-103;                                        |

|                                           |                                                                                                                                                              |    |                                                                              |                                                                                                                                                                                                                                                                     |
|-------------------------------------------|--------------------------------------------------------------------------------------------------------------------------------------------------------------|----|------------------------------------------------------------------------------|---------------------------------------------------------------------------------------------------------------------------------------------------------------------------------------------------------------------------------------------------------------------|
| Chloroindole (No.16)                      | 5-chloroindole is an intermediate for the production of pharmaceuticals                                                                                      | P  | -                                                                            |                                                                                                                                                                                                                                                                     |
| 5-Fluoroindole (No.17)                    | Intermediate for pharmaceuticals                                                                                                                             | P  | -                                                                            | W. K. Hagmann, <i>Journal of medicinal chemistry</i> , 2008, <b>51</b> , 4359-4369;                                                                                                                                                                                 |
| Chlorothieno[2,3-c]pyridine (No. 18)      | 2- Chlorothienopyridine is used as pharmaceutical, chlorothieno[2,3-c]pyridine is an intermediate for pharmaceuticals                                        | P  | -                                                                            | B. S. Collier, <i>Journal of Thrombosis and Haemostasis</i> , 2011, 9(s1), 374-395;                                                                                                                                                                                 |
| 2,3,5,6-Tetrafluorophenol (No. 19)        | Component of tetrafluorophenol (TFP)-activated resins; educt for the synthesis of polyurethane polymeric compounds used for electric double-layer capacitors | PR | -                                                                            | J. M. Salvino, R. E. Dolle, <i>Methods in Enzymology</i> , 2003, <b>369</b> , 151-163;                                                                                                                                                                              |
| 3'-(Trifluoromethyl)acetophenone (No. 20) | Intermediate for pharmaceuticals, pesticides, dyes                                                                                                           | U  | Fish toxicity LC <sub>50</sub> 17.4 mg L <sup>-1</sup> (as predicted by PNN) | CCR chemical data base                                                                                                                                                                                                                                              |
| 3,4-Dichloromethylthiobenzene (No. 21)    | Chlorinated methylthiobenzenes are formed during the biotransformation of hexachlorobenzene, Educt for the synthesis of e.g. polychlorinated biphenyls       |    | -                                                                            | G. Renner, P. T. Nguyen, <i>Xenobiotica</i> , 1984, <b>14</b> , 705-710;<br>K. Haraguch, A. Bergman, <i>Chemosphere</i> , 1991, <b>23</b> , 1837-1843;                                                                                                              |
| 3,4-Dichlorothiophenol (No. 22)           | Educt for the synthesis of dyes                                                                                                                              | U  | -                                                                            |                                                                                                                                                                                                                                                                     |
| <b>Nitrogen-containing compounds</b>      |                                                                                                                                                              |    |                                                                              |                                                                                                                                                                                                                                                                     |
| Tetramethylbutanedinitrile (No. 23)       | Decomposition product of 2,2'-azobisisobutyronitrile (polymerization initiator for monomers in plastic production)                                           | PR | Fish toxicity LC <sub>50</sub> 149 mg L <sup>-1</sup> (as predicted by PNN)  | H. Ishiwata, T. Sugita, T. Yamada, <i>Food Hygiene and Safety Science</i> , 1994, <b>35</b> , 385-389;<br>CCR chemical data base                                                                                                                                    |
| 3,3-Diphenyl-2-propenenitrile (No. 24)    | Product in the reaction of acrylonitrile with iodobenzene, used in the synthesis of intermediates in agricultural and pharmaceutical applications            | U  | -                                                                            | A. Wali, S. Muthukumar Pillai, V. K. Kaushik, S. Satish, <i>Applied Catalysis A: General</i> , 1996, <b>135</b> , 83-93;<br>D. J. Adams, J. H. Clark, L. B. Hansen, V. C. Sanders, S. J. Tavener, <i>Journal of fluorine chemistry</i> , 1998, <b>92</b> , 123-125; |

|                                           |                                                                                                                                                                                                                                          |   |                                                                                                                                                                                                                                                                                                        |                                                                                                                                                                                                                                                                                                                  |
|-------------------------------------------|------------------------------------------------------------------------------------------------------------------------------------------------------------------------------------------------------------------------------------------|---|--------------------------------------------------------------------------------------------------------------------------------------------------------------------------------------------------------------------------------------------------------------------------------------------------------|------------------------------------------------------------------------------------------------------------------------------------------------------------------------------------------------------------------------------------------------------------------------------------------------------------------|
| N-Formylmorpholine (No. 25)               | Used as selective solvent by the petroleum industry for the extraction of high-purity aromatic compounds, anticorrosive agent in fuel oil, used for the cleaning of technical gases                                                      |   | EC <sub>50</sub> >500 mg L <sup>-1</sup> , 48 h, <i>Daphnia magna</i>                                                                                                                                                                                                                                  | ECHA Chem database                                                                                                                                                                                                                                                                                               |
| <b>Sulphur-containing compounds</b>       |                                                                                                                                                                                                                                          |   |                                                                                                                                                                                                                                                                                                        |                                                                                                                                                                                                                                                                                                                  |
| Dimercaptomethane (No. 26)                | Intermediate in manufacturing of flavour concentrates, product in the synthesis of azaphospholines (intermediates for pharmaceuticals), additive for the production of synthetic rubber, formed during decomposition of organic material |   | Fish toxicity LC <sub>50</sub> 5.9 mg L <sup>-1</sup> (as predicted by PNN)                                                                                                                                                                                                                            | FAO JECFA, Compendium of food additive specifications. 68 <sup>th</sup> meeting. Food and Agriculture Organization of the United Nations, 2007, Rome;<br><br>R. M. Kamalov, G. S. Stepanov, I. A. Litvinov, M. A. Pudovik, <i>Heteroatom Chemistry</i> , 1994, <b>5</b> , 469-477;<br><br>CCR chemical data base |
| 1,2-Dimercaptoethane (No. 27)             | Complexing agent, used for the stabilization of polymers, additive for the production of synthetic rubber, educt for chemical synthesis, formed during decomposition of organic material                                                 |   | Fish toxicity LC <sub>50</sub> 9.3 mg L <sup>-1</sup> (as predicted by PNN)                                                                                                                                                                                                                            | CCR chemical data base                                                                                                                                                                                                                                                                                           |
| 2-(Methylthio)acetic acid (No. 28)        | Constituent of plants                                                                                                                                                                                                                    |   | -                                                                                                                                                                                                                                                                                                      |                                                                                                                                                                                                                                                                                                                  |
| Mercaptoacetic acid (No. 28)              | Raw material for pharmaceuticals and agricultural chemicals                                                                                                                                                                              | U | Fish toxicity LC <sub>50</sub> 383 mg L <sup>-1</sup> (as predicted by PNN)                                                                                                                                                                                                                            |                                                                                                                                                                                                                                                                                                                  |
| <b>Phosphorus-containing compounds</b>    |                                                                                                                                                                                                                                          |   |                                                                                                                                                                                                                                                                                                        |                                                                                                                                                                                                                                                                                                                  |
| TCPP (No. 29), TEP (No. 30), TBP (No. 31) | Flame retardants and plasticizers                                                                                                                                                                                                        | M | TCPP: Fish toxicity LC <sub>50</sub> 9.1 mg L <sup>-1</sup> (as predicted by PNN)<br>TEP: LC <sub>50</sub> 500 mg L <sup>-1</sup> , 48h, <i>Oryzias latipes</i> , orange-red killifish<br>TBP: Fish toxicity LC <sub>50</sub> 4.3 mg L <sup>-1</sup> , 96h, <i>Oncorhynchus mykiss</i> , rainbow trout | CCR chemical data base<br>ECHA CHEM database<br>ENVICHEM database                                                                                                                                                                                                                                                |

|                                            |                                                                                                                                                                                                       |    |                                                                                              |                                                                                                                                |
|--------------------------------------------|-------------------------------------------------------------------------------------------------------------------------------------------------------------------------------------------------------|----|----------------------------------------------------------------------------------------------|--------------------------------------------------------------------------------------------------------------------------------|
| DBMP (No. 32)                              | Educt for the manufacturing of organo-phosphorus peroxide compounds which are used as initiators of polymerization reactions or as intermediates in the production of pesticides and bleaching agents | PR | -                                                                                            |                                                                                                                                |
| BEHP (No. 33)                              | Complexing agent for rare earth elements, educt for the synthesis of polymers                                                                                                                         | PR | LC <sub>50</sub> 148 mg L <sup>-1</sup> , <i>Oryzias latipes</i> , orange-red killifish      | e.g. A. Proń, J. Laska, J. E. Österholm, P. Smith, <i>Polymer</i> , 1993, <b>34</b> , 4235-4240;<br><br>CCR chemical data base |
| <b>Oxygen-containing compounds</b>         |                                                                                                                                                                                                       |    |                                                                                              |                                                                                                                                |
| Bisphenol A (No. 34)                       | Used for the production of polycarbonates, epoxy resins and thermal paper                                                                                                                             | M  | LC <sub>50</sub> 4.6 mg L <sup>-1</sup> , 96h, <i>Pimephales promelas</i> , fathead minnow   | CCID database                                                                                                                  |
| TXIB (No. 35)                              | Plasticizer for PVC and vinyl plastics                                                                                                                                                                | M  | LC <sub>50</sub> 300 mg L <sup>-1</sup> , 24 h, <i>Daphnia magna</i>                         | I. Skjevraak, A. Due, K. O. Gjerstad, H. Herikstad, <i>Water Research</i> , 2003, <b>37</b> , 1912-1920;                       |
| Benzoic acid (No. 36)                      | Occurs in plants, used as educt for many industrial syntheses                                                                                                                                         |    | LC <sub>50</sub> 180 mg L <sup>-1</sup> , 96 h, <i>Gambusia affinis</i> , mosquitofish       | ENVICHEM database                                                                                                              |
| Phenylacetic acid (No. 37)                 | Used for production of pharmaceuticals, occurs in plants and animals                                                                                                                                  |    | EC <sub>50</sub> 802 mg L <sup>-1</sup> , 96h, <i>Xenopus laevis</i> , clawed toad           | CCR chemical data base                                                                                                         |
| 4- <i>tert</i> -Butylbenzoic acid (No. 38) | Used for the manufacture of alkyd resins                                                                                                                                                              | M  | LC <sub>50</sub> 70 mg L <sup>-1</sup> , 96 h, <i>Oryzias latipes</i> , orange-red killifish | ECHA CHEM database                                                                                                             |
| <b>Polycyclic aromatic compounds</b>       |                                                                                                                                                                                                       |    |                                                                                              |                                                                                                                                |
| DIPN (No. 39)                              | Dye solvent, constituent of coating agents, adhesives, heat transfer and insulating oils                                                                                                              |    | LC <sub>50</sub> 4.5 mg L <sup>-1</sup> , <i>Oryzias latipes</i> , orange-red killifish      | CCR chemical data base                                                                                                         |

EC<sub>50</sub>: Concentration of a chemical which induces a defined response of 50% of the members of a tested population after a specified test duration

LC<sub>50</sub>: Concentration of a chemical required to kill 50% of the members of a tested population after a specified test duration

Information from chemical data bases were obtained from: <http://www.echemportal.org>

Compound numbers refer to Table 2, full chemical names of the compounds are given in Table 1

#### Groups:

**U:** **Unspecific** educts or intermediates in the industrial production of many agricultural chemicals, pharmaceuticals and dyes

**P:** Specific **pharmaceuticals** or intermediates in the production of **pharmaceuticals**

**PR:** Educts for the synthesis of **polymers** and **resins**

**M:** Known as typical constituents of **municipal sewage**
